# Supplementary material
Source: ML conference proceedings conference paper supplement (https://proceedings.neurips.cc/paper_files/paper/2019/hash/6364d3f0f495b6ab9dcf8d3b5c6e0b01-Abstract.html)
Supplement: Supplementary file [file 6364d3f0f495b6ab9dcf8d3b5c6e0b01-Supplemental.zip]

---

# SC-SfMLearner: Supplementary

---

Jia-Wang Bian<sup>1,2</sup>, Zhichao Li<sup>3</sup>, Naiyan Wang<sup>3</sup>, Huangying Zhan<sup>1,2</sup>

Chunhua Shen<sup>1,2</sup>, Ming-Ming Cheng<sup>4</sup>, Ian Reid<sup>1,2</sup>

<sup>1</sup>University of Adelaide, Australia

<sup>2</sup>Australian Centre for Robotic Vision, Australia

<sup>3</sup>TuSimple, China

<sup>4</sup>Nankai University, China

## 1 Pose estimation results on 5-frame snippets

Although the visual odometry results shown in the main paper is more important, we also evaluate pose estimation results using Zhou et al. [1]’s evaluation metric on 5-frame snippets. Tab. 1 shows the results, where our method shows slightly lower performances with the state-of-the-art methods but the gap is small.

Table 1: Pose estimation results on KITTI odometry dataset.

|                       | Seq. 09                             | Seq. 10                             |
|-----------------------|-------------------------------------|-------------------------------------|
| ORB-SLAM (full)       | $0.014 \pm 0.008$                   | $0.012 \pm 0.011$                   |
| ORB-SLAM (short)      | $0.064 \pm 0.141$                   | $0.064 \pm 0.130$                   |
| Mean Odometry         | $0.032 \pm 0.026$                   | $0.028 \pm 0.023$                   |
| Zhou et al. [1]       | $0.021 \pm 0.017$                   | $0.020 \pm 0.015$                   |
| Mahjourian et al. [2] | $0.013 \pm 0.010$                   | $0.012 \pm 0.011$                   |
| GeoNet [3]            | <b><math>0.012 \pm 0.007</math></b> | <b><math>0.012 \pm 0.009</math></b> |
| DF-Net [4]            | $0.017 \pm 0.007$                   | $0.015 \pm 0.009$                   |
| CC [5]                | <b><math>0.012 \pm 0.007</math></b> | <b><math>0.012 \pm 0.009</math></b> |
| Ours                  | $0.016 \pm 0.007$                   | $0.015 \pm 0.015$                   |

## 2 Depth estimation results on Make3D dataset.

To verify the generalization ability of the trained model, we also test it on Make3D dataset [6]. Tab. 2 shows the relative depth error, where our model is trained on KITTI [7] without fine-tuning on Make3D [8]. The results demonstrate that our method performs slightly better than other state-of-the-art methods.

Table 2: Depth results (AbsRel) on Make3D [6] test set without finetuning.

| Methods | Zhou et al. [1] | Godard et al. [9] | DF-Net et al. [4] | CC [5] | Ours         |
|---------|-----------------|-------------------|-------------------|--------|--------------|
| AbsRel  | 0.383           | 0.544             | 0.331             | 0.320  | <b>0.312</b> |

## 3 More qualitative results

Fig. 1 illustrates visual results of depth estimation and occlusion detection by the proposed approach. It demonstrates the efficacy of proposed mask in terms of detecting moving objects and occlusions.

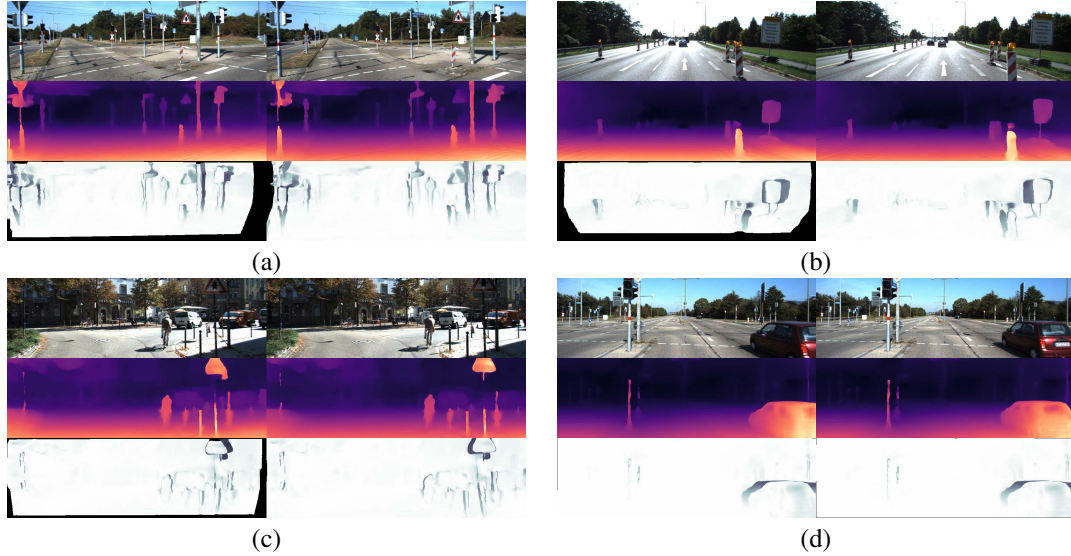

Figure 1: Visual results. Top to bottom: sample image, estimated depth, self-discovered mask. The proposed mask can effectively identify inconsistent pixels caused by moving objects and occlusions.

## References

- [1] Tinghui Zhou, Matthew Brown, Noah Snavely, and David G Lowe. Unsupervised learning of depth and ego-motion from video. In *IEEE Conference on Computer Vision and Pattern Recognition (CVPR)*, 2017.
- [2] Reza Mahjourian, Martin Wicke, and Anelia Angelova. Unsupervised learning of depth and ego-motion from monocular video using 3d geometric constraints. In *IEEE Conference on Computer Vision and Pattern Recognition (CVPR)*, 2018.
- [3] Zhichao Yin and Jianping Shi. GeoNet: Unsupervised learning of dense depth, optical flow and camera pose. In *IEEE Conference on Computer Vision and Pattern Recognition (CVPR)*, 2018.
- [4] Yuliang Zou, Zelun Luo, and Jia-Bin Huang. DF-Net: Unsupervised joint learning of depth and flow using cross-task consistency. In *European Conference on Computer Vision (ECCV)*, 2018.
- [5] Anurag Ranjan, Varun Jampani, Kihwan Kim, Deqing Sun, Jonas Wulff, and Michael J Black. Competitive Collaboration: Joint unsupervised learning of depth, camera motion, optical flow and motion segmentation. *IEEE Conference on Computer Vision and Pattern Recognition (CVPR)*, 2019.
- [6] Ashutosh Saxena, Sung H Chung, and Andrew Y Ng. Learning depth from single monocular images. In *Neural Information Processing Systems (NIPS)*, 2006.
- [7] Andreas Geiger, Philip Lenz, Christoph Stiller, and Raquel Urtasun. Vision meets Robotics: The kitti dataset. *International Journal of Robotics Research (IJRR)*, 2013.
- [8] Fayao Liu, Chunhua Shen, Guosheng Lin, and Ian Reid. Learning depth from single monocular images using deep convolutional neural fields. *IEEE Transactions on Pattern Recognition and Machine Intelligence (PAMI)*, 38(10), 2016.
- [9] Clément Godard, Oisín Mac Aodha, and Gabriel J Brostow. Unsupervised monocular depth estimation with left-right consistency. In *IEEE Conference on Computer Vision and Pattern Recognition (CVPR)*, 2017.
